# Supplementary material for: The transmembrane domain of HIV-1 Vpu is sufficient to confer anti-tetherin activity to SIVcpz and SIVgor Vpu proteins: cytoplasmic determinants of Vpu function
Source: PubMed Central journal article supplement (PMC3621411; doi:10.1186/1742-4690-10-32), 2013-03-20

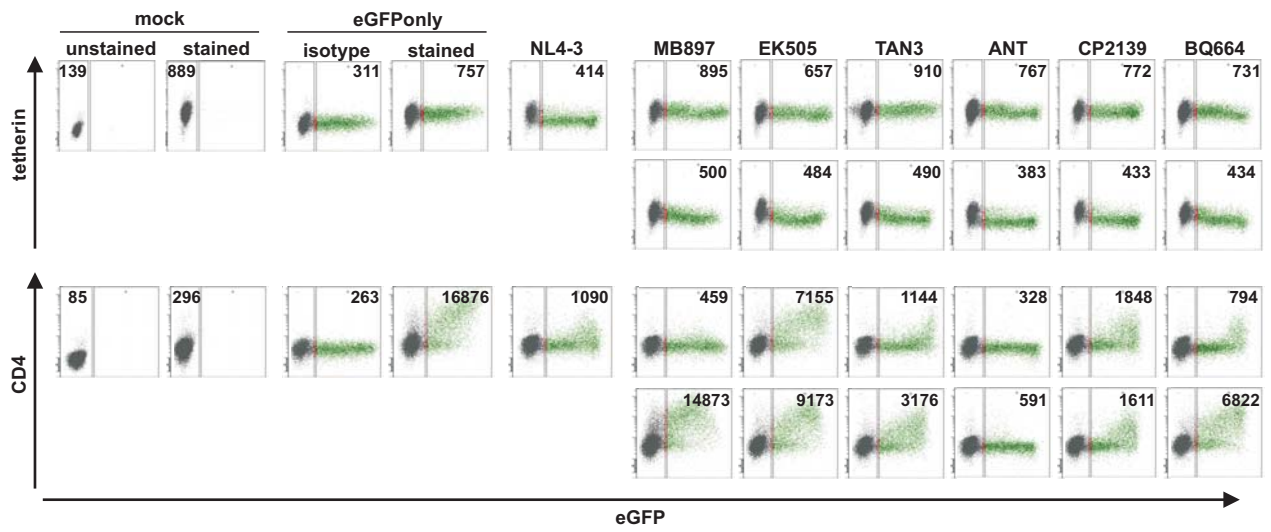

Supplement: 1742-4690-10-32-S2.pdf [file 1742-4690-10-32-S2.pdf]
